# Supplementary material for: Synthesis and characterization of polyfluorene-based photoelectric materials: the effect of coil segment on the spectral stability
Source: Royal Society of Chemistry journal article supplement (doi:10.1039/c4ra01616e), 2014-01-01
Supplement: c4ra01616e1.pdf [file c4ra01616e1.pdf]

## **Electronic Supplementary Information**

for

### **Synthesis and Characterization of Polyfluorene-based Photoelectric Materials: the Effect of Coil Segment on the Spectral Stability**

Jin-Jin Li<sup>1</sup>, Jian-Jian Wang<sup>2</sup>, Yin-Ning Zhou<sup>1</sup>, Zheng-Hong Luo<sup>1, 2\*</sup>

*<sup>1</sup>Department of Chemical Engineering, School of Chemistry and Chemical  
Engineering, Shanghai Jiao Tong University, Shanghai 200240, P. R. China*

*<sup>2</sup>Department of Chemical and Biochemical Engineering, College of Chemistry and  
Chemical Engineering, Xiamen University, Xiamen 361005, P. R. China*

\* Correspondence to: Prof. Z.H. Luo; e-mail: [luozh@sjtu.edu.cn](mailto:luozh@sjtu.edu.cn)

Tel.: +86-21-54745602

Fax: +86-21-54745602

**Figure S1** shows the  $^1\text{H}$  NMR spectra of PF-OH (**Figure S1-a**) and PF-Br (**Figure S1-b**). The proton signals from the hydroxyl moiety of PF-OH were clearly observed at 4.77 ppm, indicating the successful incorporation of the end-capper 4-bromobenzyl alcohol. Conversion of the end groups into bromide (PF-Br) was confirmed by the disappearance of the signal at 4.77 ppm and the appearance of peaks at 5.28 ppm.

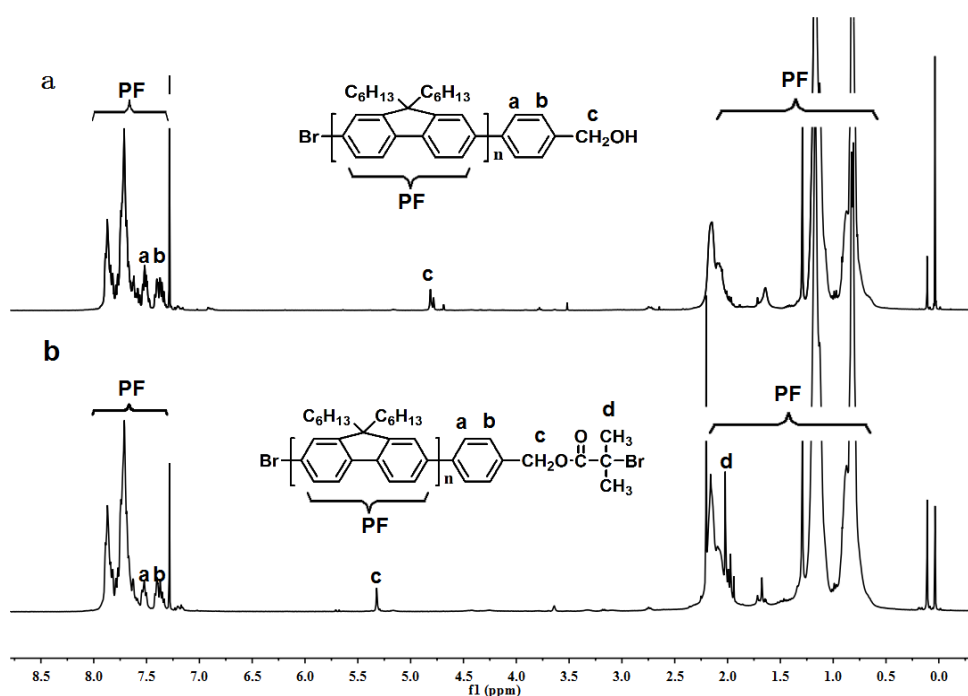

**Figure S1.**  $^1\text{H}$  NMR spectra of (a) PF-OH and (b) PF-Br in  $\text{CDCl}_3$ .

The successful synthesis of PF-OH and PF-Br also can be confirmed by the appearance of the adsorption peak at  $3435\text{ cm}^{-1}$  in **Figure S2-a** and  $1735\text{ cm}^{-1}$  in **Figure S2-b**, which were assigned to the stretching vibrations of the  $-\text{OH}$  group in the end-capper 4-bromobenzyl alcohol and the  $\text{C}=\text{O}$  group in 2-bromoisobutyryl bromide, respectively.

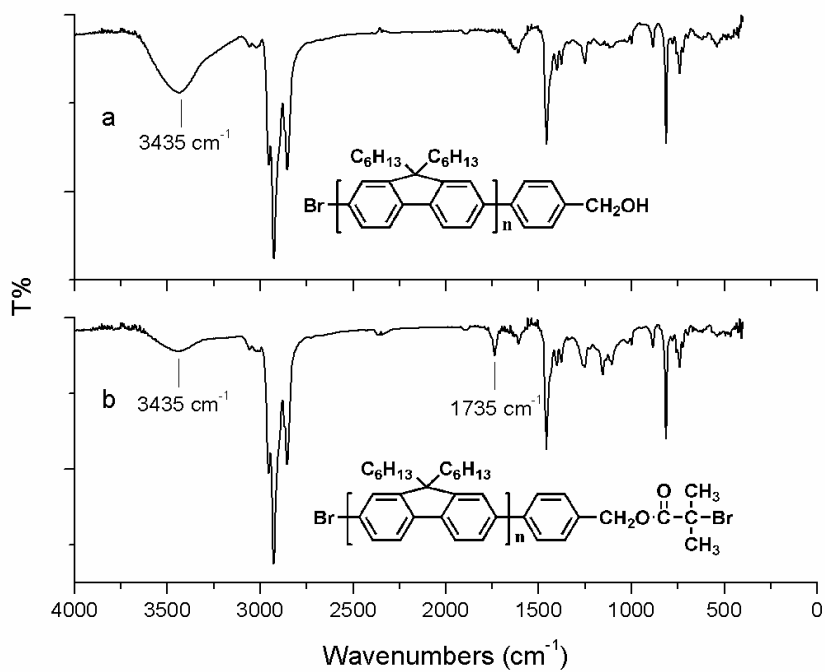

**Figure S2.** FTIR spectra of (a) PF-OH and (b) PF-Br.
